# Supplementary material for: Mechanochromic Phenomenon of Dihydropyrimidine and Chemosensing Detection of Cr6+ and Mn7+ in Aqueous Media
Source: Research Square preprint supplement (doi:10.21203/rs.3.rs-8424566/v1), 2026-01-05
Supplement: Supplementary file 1 [file 94c2c1672cb37ea7f3c33539.docx]

**Mechanochromic Phenomenon of Dihydropyrimidine and Chemosensing Detection of Cr6+ and Mn7+ in Aqueous Media**

**Trupti B. Yadava, Omkar S. Nilleb, Sneha R. Bhosalea,Alfredi A. Moyoa, Sneha V. Kopardeb, Govind B. Kolekarb, Tanaji R. Bhosalec, Prashant V. Anbhulea,***

aMedicinal Chemistry Research Laboratory, Department of Chemistry, Shivaji University, Kolhapur-416004, MS, India.

bFluorescence Spectroscopy Research Laboratory, Department of Chemistry, Shivaji University, Kolhapur-416004, MS, India.

**c**Department of Chemistry, D. Y. Patil Agriculture and Technical University, Talsande, 416112, India

**Corresponding Author:**

Prof. Prashant V. Anbhule

Medicinal Chemistry Research Laboratory,

Department of Chemistry, Shivaji University, Kolhapur,416004, M.S., India

**Email:** pva_chem@gmail.com

| **Table of Contents** | | | | |
| --- | --- | --- | --- | --- |
| **Sr. No.** | | **Contents** | **Page No.** | |
| **Characterizations** | | | | |
| **1** | **Text S1. FTIR of TPE-CHO** | | | **S3** |
| **2** | **Text S2. 1HNMR of TPE-CHO** | | | **S4** |
| **3** | **Text S3. 13C NMR** | | | **S5** |
| **4** | **Text S4. HRMS of TPE-CHO** | | | **S6** |
| **5** | **Text S5. FTIR of A-TPE** | | | **S7** |
| **6** | **Text S6. 1HNMR of A-TPE** | | | **S8** |
| **7** | **Text S7. 13C NMR of A-TPE** | | | **S9** |
| **8** | **Text S8. HRMS OF A-TPE** | | | **S10** |

**FTIR of TPE-CHO:**


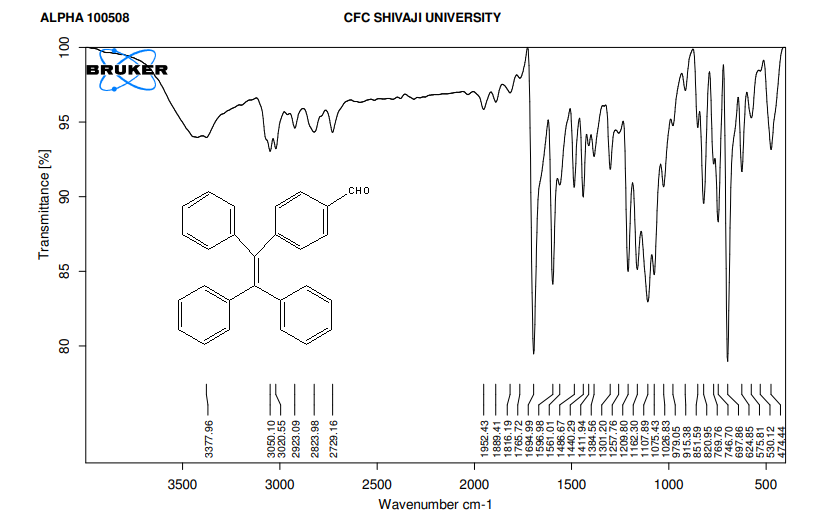


**Fig.S1. IR Spectrum of the** **4-(1,2,2-Triphenylvinyl)benzaldehyde**

**1H NMR TPE-CHO:**


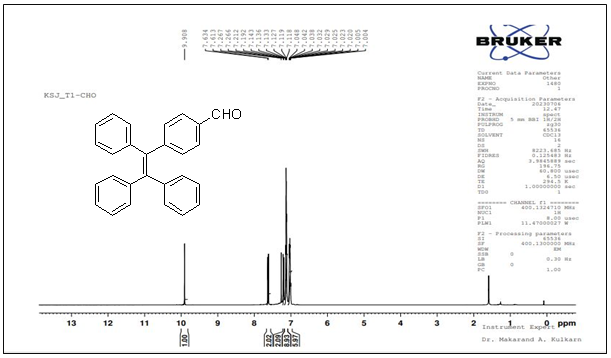


**Fig.S2 1H NMR Spectrum of 4-(1,2,2-Triphenylvinyl) benzaldehyde**

**13C NMR:**


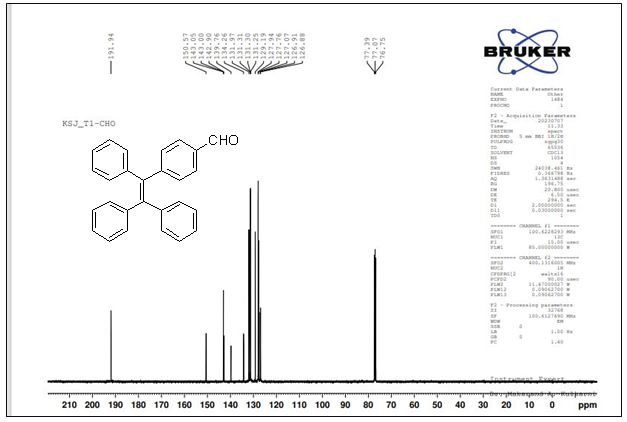


**Fig.S3 13C NMR Spectrum of 4-(1,2,2-Triphenylvinyl) benzaldehyde**

**HRMS of TPE-CHO:**


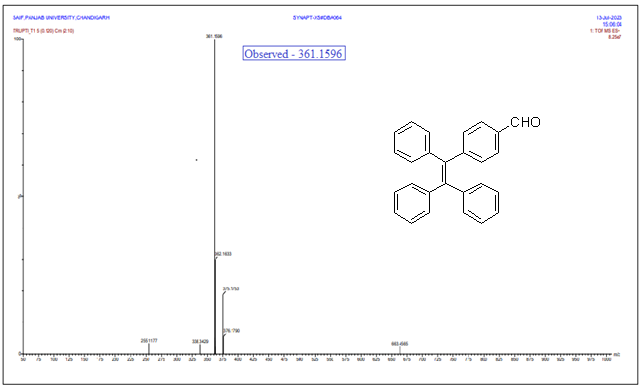


**Fig.S4 HRMS spectrum of 4-(1,2,2-Triphenylvinyl) benzaldehyde**

**FTIR of A-TPE:**

**
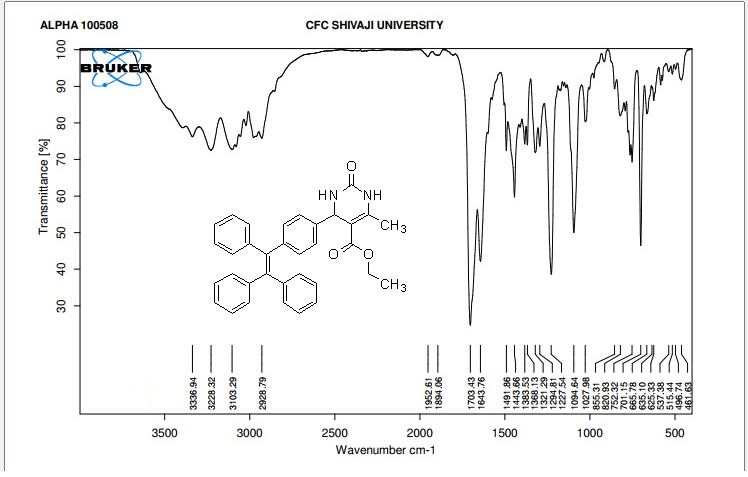
**

**Fig.S5. IR Spectrum of the A-TPE**

**1H NMR A-TPE:**

**
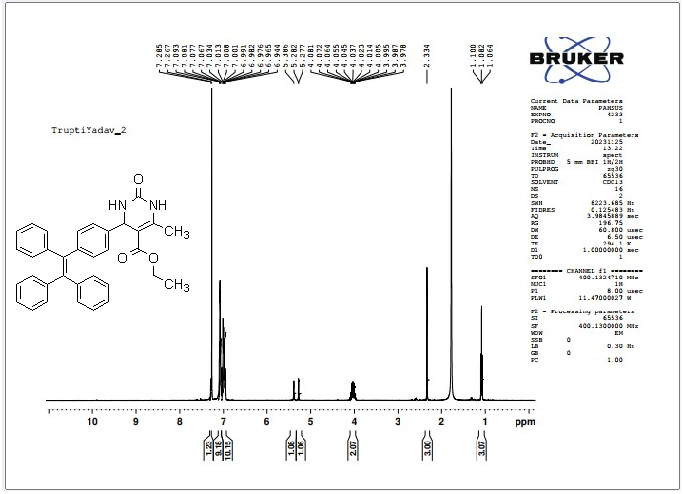
**

**Fig.S6 1H NMR Spectrum of the A-TPE**

**13C NMR of A-TPE:**

**Fig.S7 13C NMR Spectrum of the A-TPE**

**
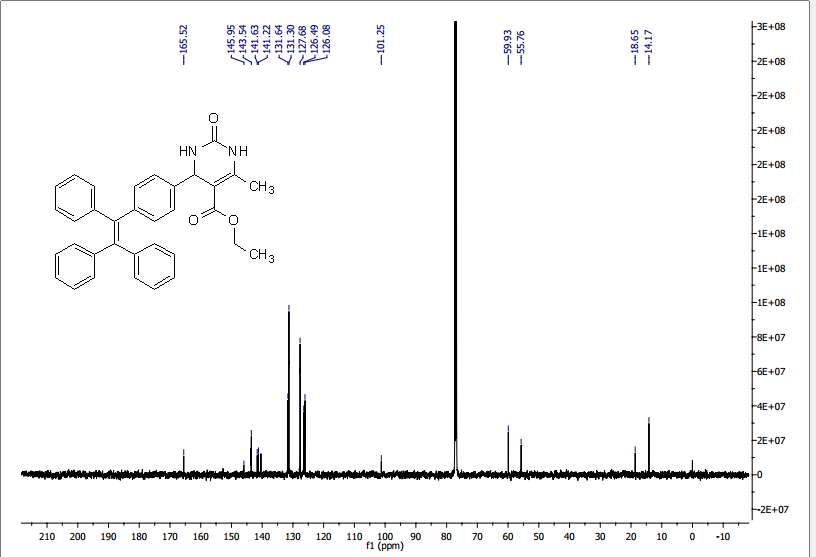
**

**HRMS of A-TPE:**

**Fig.S8 HRMS Spectrum of A-TPE**

**
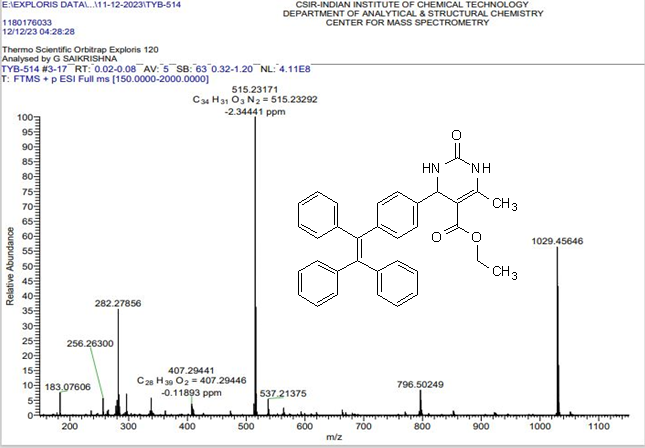
**
